# Supplementary material for: A portable optic fiber aptasensor for sensitive, specific and rapid detection of bisphenol-A in water samples
Source: Royal Society of Chemistry journal article supplement (doi:10.1039/c4em00046c), 2014-01-01
Supplement: c4em00046c1.pdf [file c4em00046c1.pdf]

**Supporting Information Cover Sheet**

**Environmental Science: Processes & Impacts:**

**Manuscript title: A Portable Optic Fiber Aptasensor for Sensitive, Specific and Rapid Detection of Bisphenol-A in Water Samples**

**Corresponding author:** Prof. April Z. Gu

**Authors:** Nimet Yildirim, Feng Long, Miao He, Han-Chang Shi and April Z. Gu

**Number of Pages:** 5

**Number of Figures:** 4

**Number of Tables:** 1

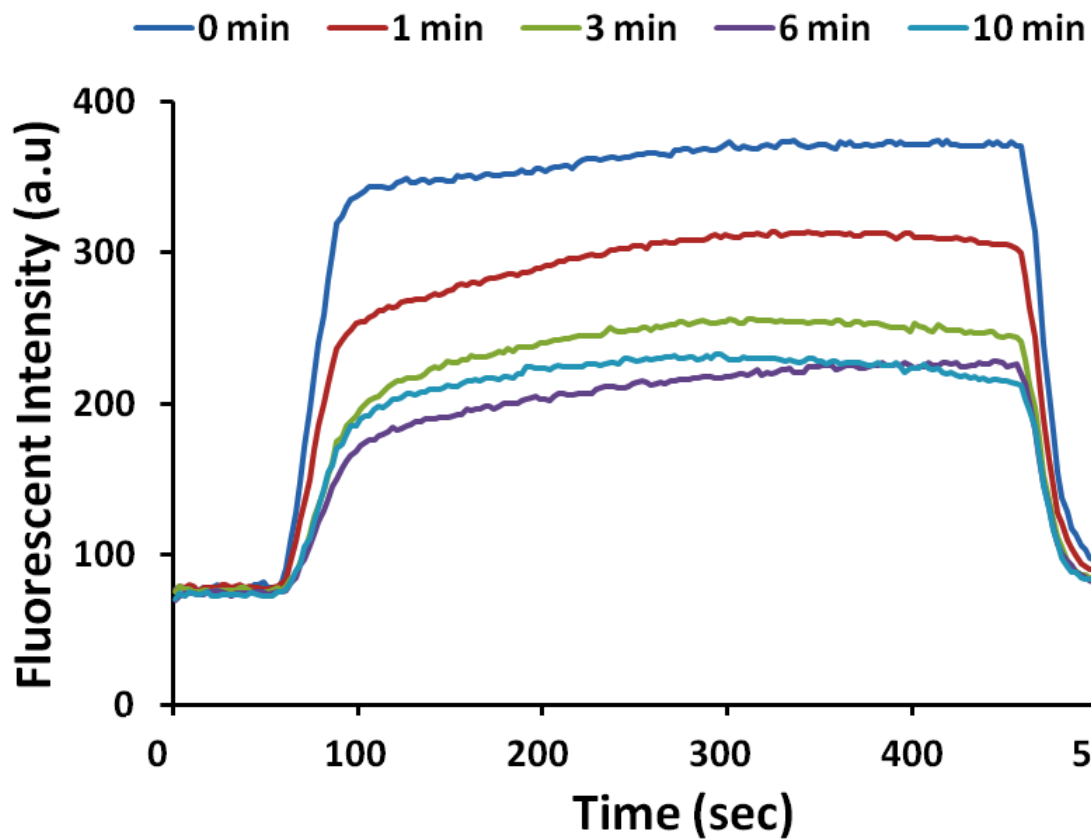

**Fig. S1-** The fluorescent intensities obtained with different pre-mixing time of Bisphenol A (10 nM) and its specific aptamer (100 nM).

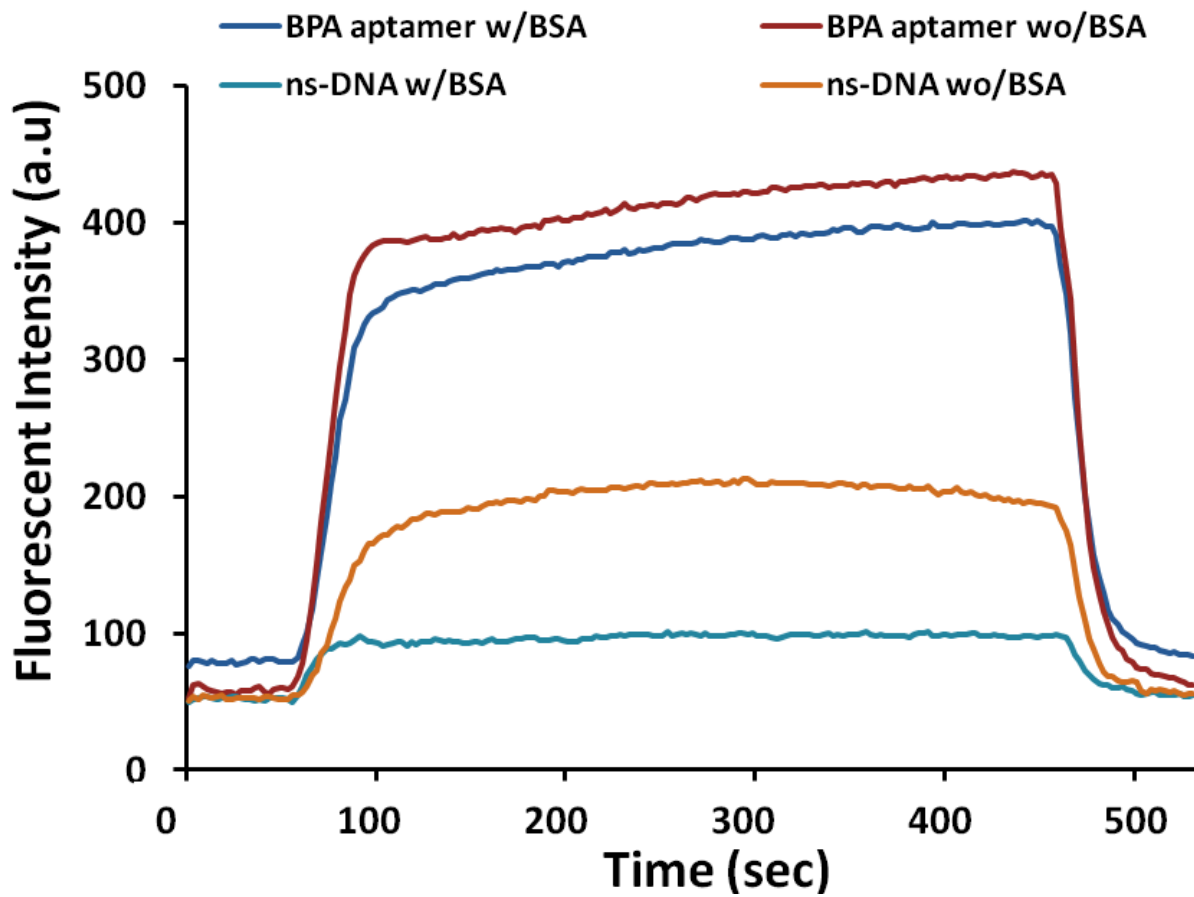

**Fig. S2-** Sensor's performance and responses to various controls; w/BSA; experiment with BSA injection, w/o BSA; experiment without BSA injection, nsDNA; experiment with nonspecific DNA.

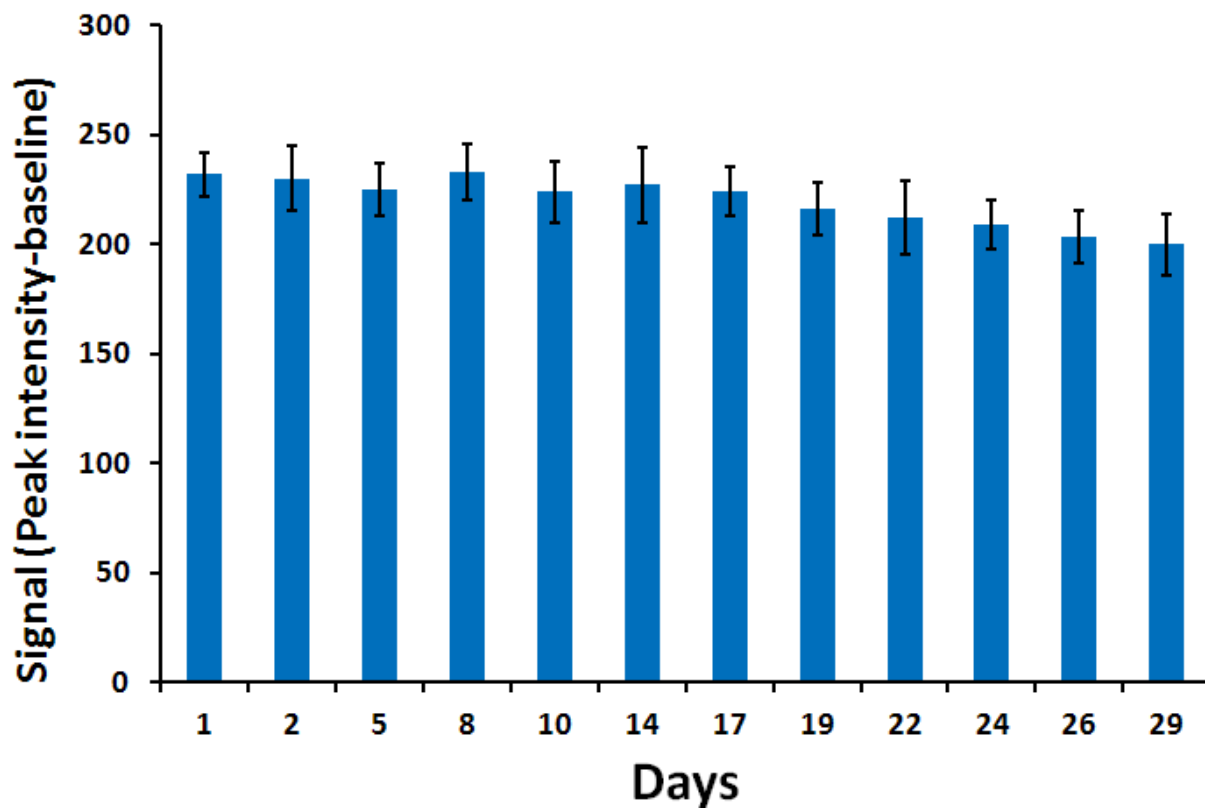

**Fig. S3-** Assessment of the stability of the BPA sensing system. Signals for daily average of two measurements of 25 nM BPA detection.

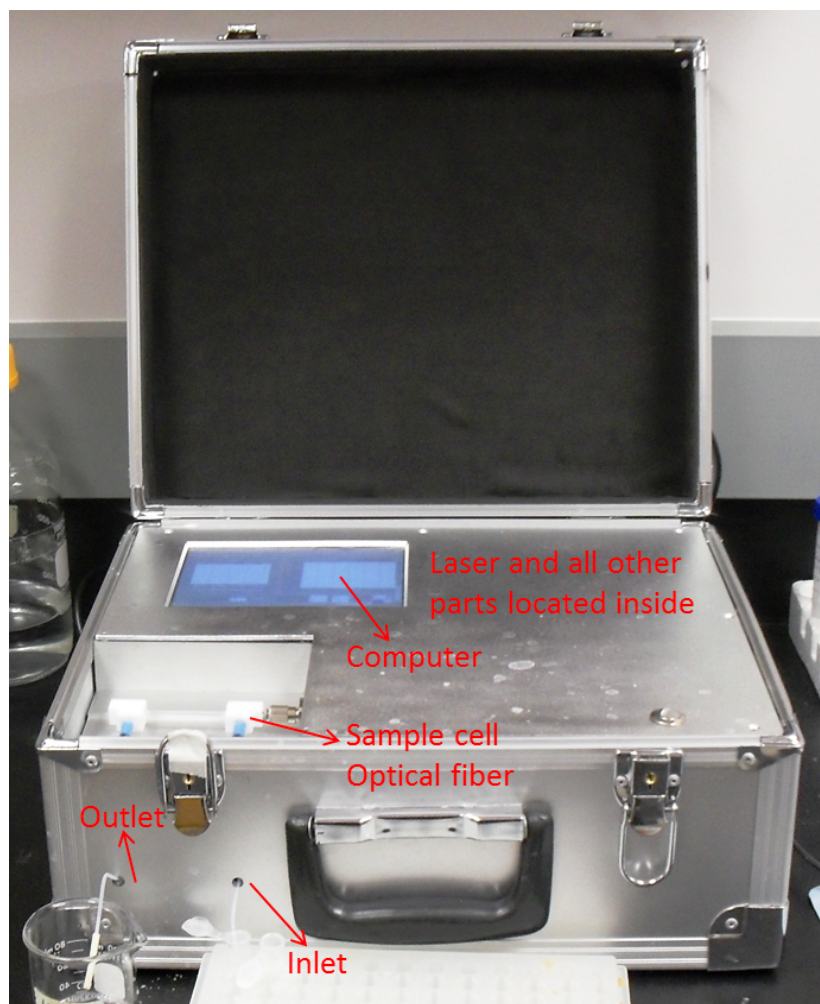

**Figure S4.** The original picture of the portable optical-fiber sensing platform.

| Detector | Sample         | Detection limit         | Chromatographic data                                                                                                                    | Ref. no. |
|----------|----------------|-------------------------|-----------------------------------------------------------------------------------------------------------------------------------------|----------|
| GC-MS    | Drinking water | 0.4 ng L <sup>-1</sup>  | CC: HP-1 (30 m × 0.32 mm i.d. × 0.25 μm)                                                                                                | 30       |
| GC-MS    | Drinking water | 1 ng mL <sup>-1</sup>   | CC: DB-35MS (30 m × 0.258 mm i.d. × 0.25 μm)                                                                                            | 31       |
| GC-MS    | Drinking water | 0.6 ng mL <sup>-1</sup> | CC: DB-1 (30 m × 0.32 mm i.d. × 0.25 μm)                                                                                                | 32       |
| HPLC-FL  | Drinking water | 0.03 μg L <sup>-1</sup> | MPh: methanol-water-acetonitrile 25:26.2:48.8 (% v/v)<br>MoS: isocratic elution<br>C: Shandon Hypercarb S (150 mm × 4.6 mm i.d. × 7 μm) | 33       |
| HPLC-UV  | Drinking water | 0.36 ng L <sup>-1</sup> | MPh: 20 mM phosphate buffer-acetonitrile 65:35 (% v/v)<br>MoS: gradient elution<br>C: Shim-pack VP-ODS (150 mm × 4.6 mm i.d. × 5 μm)    | 34       |

**Table S1.** Determination of bisphenol A by standard chromatographic methods.
